# Supplementary material for: Dense inter-particle interaction mediated spontaneous exchange bias in NiO nanoparticles
Source: Royal Society of Chemistry journal article supplement (doi:10.1039/c5ra24673c), 2015-12-22
Supplement: c5ra24673c1.pdf [file c5ra24673c1.pdf]

## Supplementary information

### **Dense Inter-particle Interaction Mediated Spontaneous Exchange Bias in NiO Nanoparticles**

Ashish Chhaganal Gandhi<sup>a,b</sup>, Jayashree Pant<sup>c</sup>, and Sheng Yun Wu<sup>\*,a</sup>

<sup>a</sup>Department of Physics, National Dong Hwa University, Hualien 97401, Taiwan

<sup>b</sup>Center for Condensed Matter Sciences, National Taiwan University, Taipei, Taiwan

<sup>c</sup>Department of Physics, Abasaheb Garware College, Savitribai Phule Pune University, India

**Figure S1** (a)-(b) M(T) curves measured with the ZFC-FC protocol in an external magnetic field of 100 Oe for 31(2) and 54(6) nm NiO nanoparticles, respectively

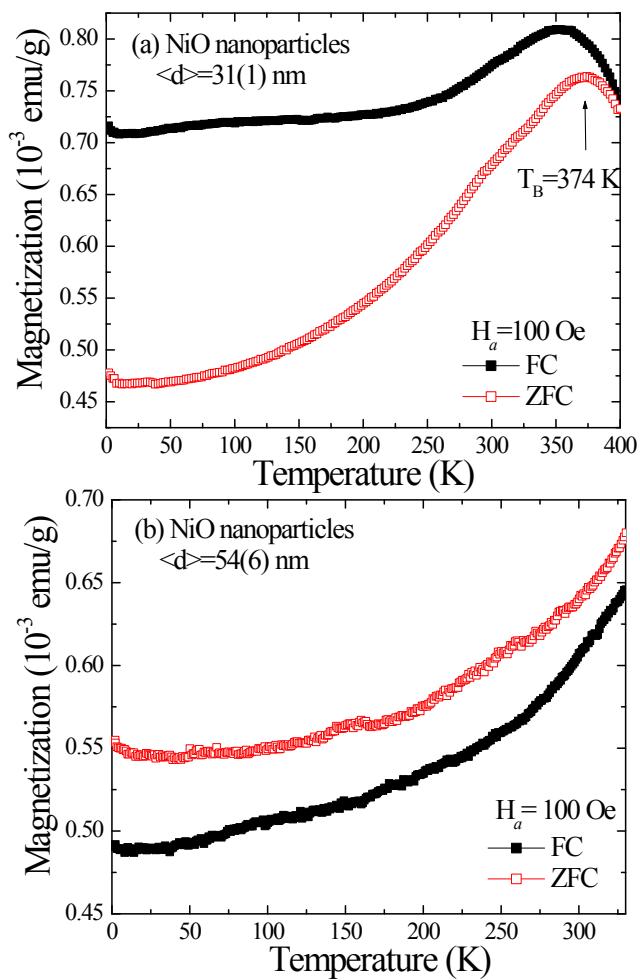

**Figures S2 (a)-(e)** show the full magnetization hysteresis  $M(H_a)$  loops measured at 25 K with  $p$ - and  $n$ -type protocols after zero-field cooling for 16.6(7) to 54(6) nm NiO nanoparticles. The two-component magnetic behavior, ferromagnetic (FM) in the low field region and non-saturating antiferromagnetic (AFM) in the high field region is clearly visible in **Figures S2 (a)-(b)**<sup>S2</sup>. As the annealing temperature increases further the AFM component overcomes the FM component due to increased nanoparticle size and reduced nickel vacancies. Furthermore, the value of the magnetization observed at the highest applied field of 20 kOe decreases with the increase of particle size, which is in good agreement with previous reports<sup>S3</sup>.

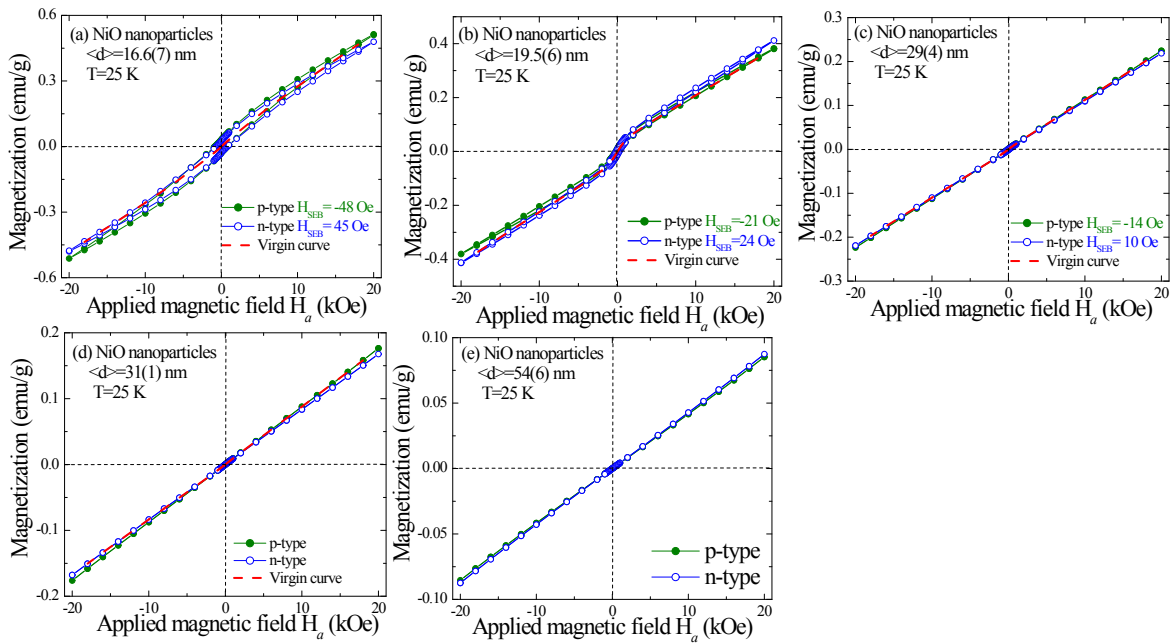

**Figures S3 (a)-(e)** Full magnetization hysteresis  $M(H_a)$  loops measured at different temperatures of 2, 25, 50, 100, 200 and 300 K with the  $p$ -type protocol after zero-field cooling for 16.6(7) to 54(6) nm NiO nanoparticles.

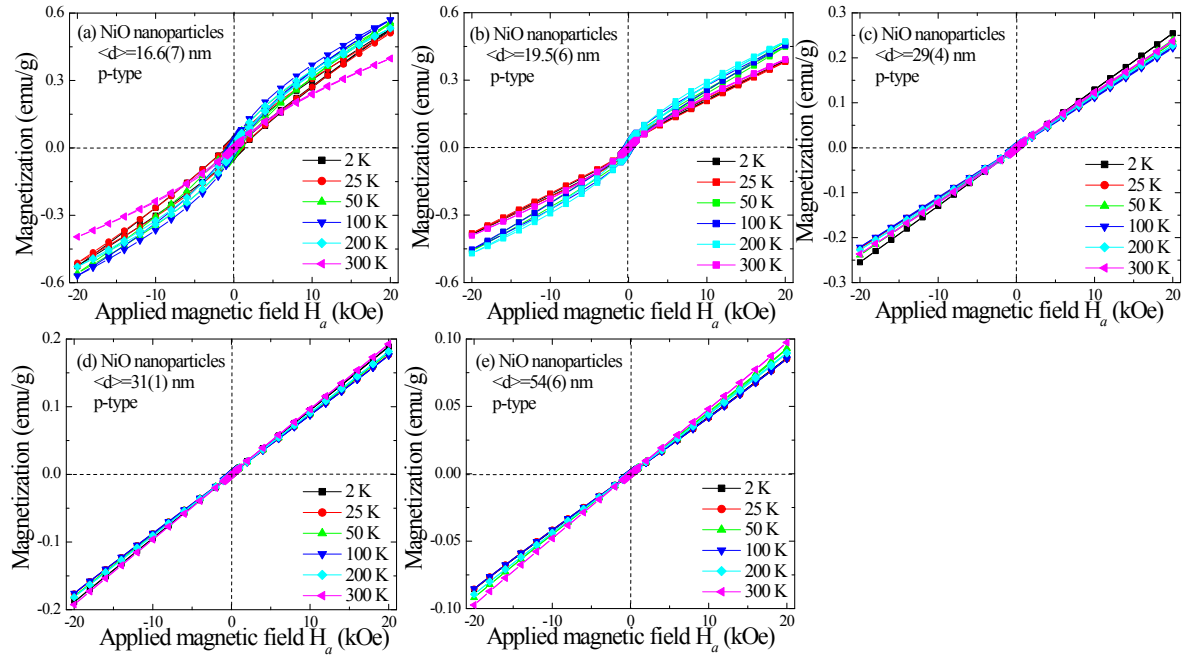

**Figures S4 (a)-(e)** Full magnetization hysteresis  $M(H_a)$  loops measured at different temperatures of 2, 25, 50, 100, 200 and 300 K with the  $n$ -type protocol after zero-field cooling for 16.6(7) to 54(6) nm NiO nanoparticles.

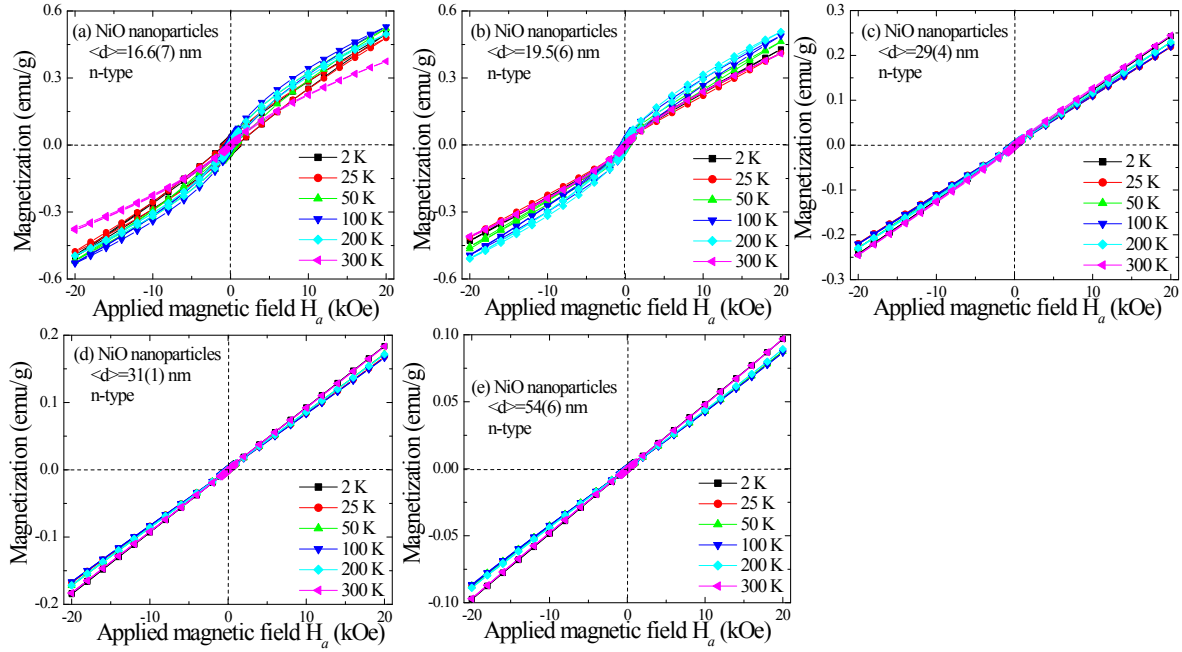

**Figure S5** shows full magnetization hysteresis  $M(H_a)$  loops measured at 60 K with the  $p$ -type protocol after field cooling (0 to 25 kOe) for 16.6(7) nm NiO nanoparticles. A and B indicate the observed asymmetric vertical loop shift in magnetization at higher magnetic fields.

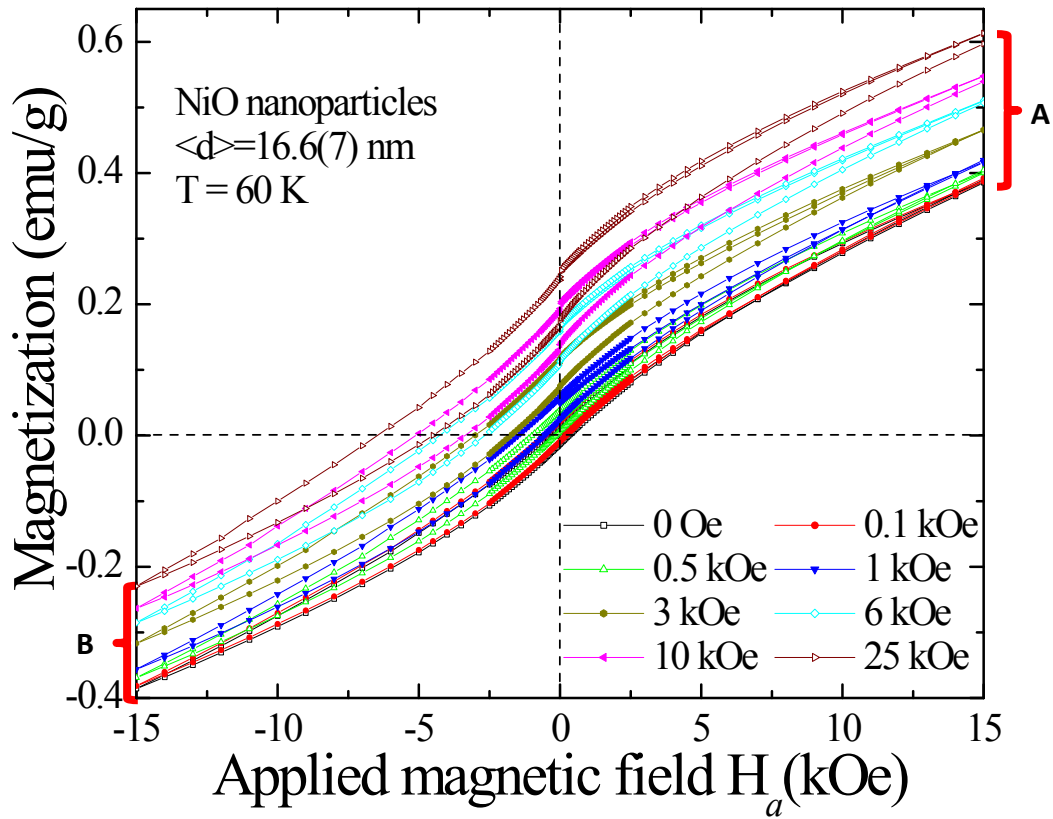

## References

- S1. R. H. Kodama, A. E. Berkowitz, J. E. McNiff and S. Foner, *Phys. Rev. Lett.* 1996, **77** 394-397
- S2. S. Mandal, K. S. R. Menon, S. K. Mahatha, S. Banerjee, *Appl. Phys. Lett.* 2011, **99** 232507.
- S3. S. D. Tiwari and K. P. Rajeev, *Phys. Rev. B* 2005, **72** 104433.

**Table S1** Values of  $H_{SEB}$ ,  $H_C$ ,  $M_{VS}$ , and  $M_r$  obtained for  $p$ -type  $M(H_a)$ .

| Sample                           | Temperature (K) | $H_{SEB}$ (Oe) | $H_C$ (Oe) | $M_{VS}$ ( $10^{-4}$ emu/g) | $M_r$ ( $10^{-2}$ emu/g) |
|----------------------------------|-----------------|----------------|------------|-----------------------------|--------------------------|
| $\langle d \rangle = 16.6(7)$ nm | 2               | -21            | 903        | 6.44                        | 3.2511                   |
|                                  | 25              | -47.5          | 827.5      | 13.94                       | 3.0169                   |
|                                  | 50              | -52.5          | 597.5      | 19.43                       | 2.8228                   |
|                                  | 100             | -37.5          | 376.5      | 18.97                       | 2.2247                   |
|                                  | 200             | -27            | 204        | 14.18                       | 1.1407                   |
|                                  | 300             | -24.5          | 79.5       | 8.25                        | 0.2690                   |
| $\langle d \rangle = 19.5(6)$ nm | 2               | -6.5           | 148.5      | 3.19                        | 0.7839                   |
|                                  | 25              | -20.5          | 197.5      | 9.97                        | 1.0534                   |
|                                  | 50              | -24.5          | 201.5      | 6.68                        | 1.1696                   |
|                                  | 100             | -16.5          | 259.5      | 9.22                        | 1.5882                   |
|                                  | 200             | -5.5           | 152.5      | 5.78                        | 1.103                    |
|                                  | 300             | -1.5           | 43.5       | 0.65                        | 0.1709                   |
| $\langle d \rangle = 29(4)$ nm   | 2               | -3             | 50         | -1.90                       | 0.0831                   |
|                                  | 25              | -14            | 62         | 3.00                        | 0.1031                   |
|                                  | 50              | -11.5          | 81.5       | 1.63                        | 0.1297                   |
|                                  | 100             | -24            | 143        | 3.55                        | 0.2142                   |
|                                  | 200             | -22            | 148        | 4.23                        | 0.2414                   |
|                                  | 300             | -32.5          | 88.5       | 5.25                        | 0.151                    |
| $\langle d \rangle = 31(1)$ nm   | 2               | -15.5          | 6.5        | 1.19                        | 0.0056                   |
|                                  | 25              | -12            | 5          | 1.16                        | 0.0048                   |
|                                  | 50              | -11            | 14         | 1.09                        | 0.0135                   |
|                                  | 100             | -11            | 35         | 3.32                        | 0.0104                   |
|                                  | 200             | -7             | 36         | 3.64                        | 0.0075                   |
|                                  | 300             | 2              | 12         | -0.20                       | 0.0089                   |
| $\langle d \rangle = 54(6)$ nm   | 2               | 7.5            | 8.5        | -0.31                       | 0.0034                   |



|     |      |      |       |        |
|-----|------|------|-------|--------|
| 25  | 3    | 21   | -0.13 | 0.0069 |
| 50  | 7    | 17   | -0.35 | 0.0076 |
| 100 | 5    | 21   | -0.14 | 0.0043 |
| 200 | -5   | 18   | 0.25  | 0.0078 |
| 300 | -4.5 | 22.5 | 0.097 | 0.0085 |

---

**Table S2** Values of  $H_{SEB}$ ,  $H_C$ ,  $M_{VS}$ , and  $M_r$  obtained for  $n$ -type  $M(H_a)$ .

| Sample         | Temperature (K) | $H_{SEB}$ (Oe) | $H_C$ (Oe) | $M_{VS}$ ( $10^{-4}$ emu/g) | $M_r$ ( $10^{-2}$ emu/g) |
|----------------|-----------------|----------------|------------|-----------------------------|--------------------------|
| <d>=16.6(7) nm | 2               | 39             | 813        | -12.17                      | 2.8913                   |
|                | 25              | 45             | 734        | -12.47                      | 2.6788                   |
|                | 50              | 36             | 511        | -12.28                      | 2.4467                   |
|                | 100             | 13             | 301        | -5.92                       | 1.8637                   |
|                | 200             | -4             | 165        | 1.55                        | 0.9465                   |
|                | 300             | -11            | 65         | 3.71                        | 0.2091                   |
| <d>=19.5(6) nm | 2               | 12.5           | 149.5      | -3.02                       | 0.3991                   |
|                | 25              | 24             | 194        | -7.84                       | 0.6610                   |
|                | 50              | 29.5           | 213.5      | -9.94                       | 0.8306                   |
|                | 100             | 35             | 256        | -11.33                      | 1.1282                   |
|                | 200             | 24             | 182        | -6.83                       | 0.8314                   |
|                | 300             | 3.5            | 45.5       | -0.74                       | 0.1237                   |
| <d>=29(4) nm   | 2               | 1.5            | 54.5       | -1.9                        | 0.0882                   |
|                | 25              | 10             | 63         | -2.3                        | 0.1085                   |
|                | 50              | 31             | 84         | -2.8                        | 0.1319                   |
|                | 100             | 23.5           | 147.5      | -4.4                        | 0.2197                   |
|                | 200             | 3              | 153        | -3.0                        | 0.2522                   |
|                | 300             | 29.5           | 82.5       | -3.2                        | 0.1564                   |
| <d>=31(1) nm   | 2               | 0              | 9          | 0.0064                      | 0.0072                   |
|                | 25              | -1.5           | 4.5        | 0.0951                      | 0.0029                   |
|                | 50              | -0.5           | 12.5       | 0.0807                      | 0.0114                   |
|                | 100             | -3             | 25         | 0.3718                      | 0.0232                   |
|                | 200             | 0.5            | 26.5       | 0.0112                      | 0.0258                   |
|                | 300             | -5.5           | 9.5        | 0.3249                      | 0.0057                   |
| <d>=54(6) nm   | 2               | 1              | 20         | -0.0461                     | 0.0103                   |

|     |      |      |        |        |
|-----|------|------|--------|--------|
| 25  | -3   | 24   | 0.1720 | 0.0102 |
| 50  | -2.5 | 13.5 | 0.1121 | 0.0054 |
| 100 | -9   | 29   | 0.3051 | 0.0076 |
| 200 | -5   | 17   | 0.2286 | 0.0068 |
| 300 | -2   | 12   | 0.1236 | 0.0060 |

---
